# Supplementary material
Source: publisher site journal article supplement (https://www.spandidos-publications.com/1783/downloadSupplementary)
Supplement: Supplementary file 1 [file downloadSupplementary]

Figure S1. Post-operative recovery of patients in groups B and C. In group B, case 5 had impaired chewing function and case 10 had tumor recurrence post-operatively. In group C, case 16 had good post-operative dental restoration. However, case 17 had post-operative infection, and both cases 18 and 19 had impaired chewing function post-operatively.

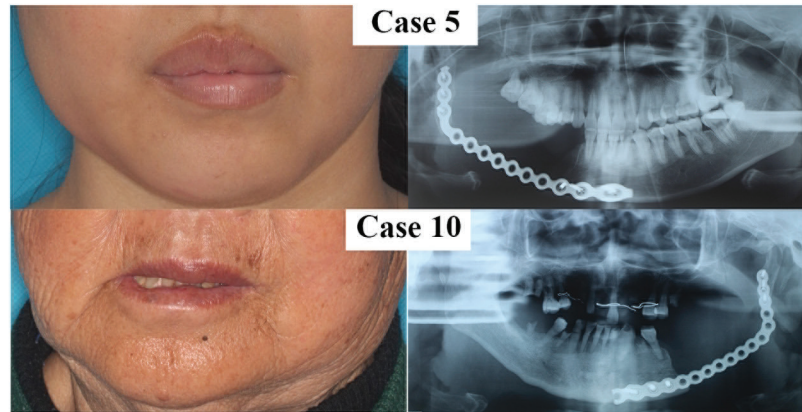

**Post-operative recovery of patient cases 5 and case 10 in group B**

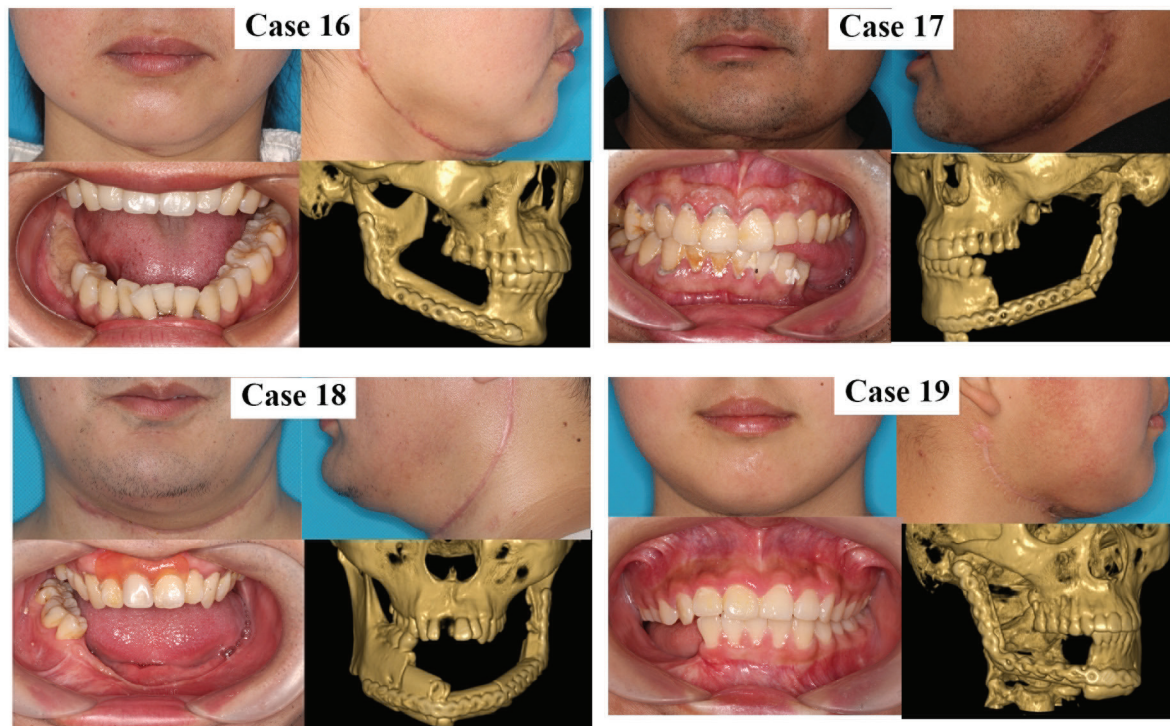

**Post-operative recovery of patient cases 16, 17, 18 and 19 in group C**

Table SI. Patient information.

| Case | Group | Sex    | Age,<br>years | Diagnosis                         | Defect<br>site | Number of<br>previous<br>operations | Surgical<br>approach                     |
|------|-------|--------|---------------|-----------------------------------|----------------|-------------------------------------|------------------------------------------|
| 1    | A     | Male   | 35            | Ameloblastoma                     | RB             | 2                                   | Customized titanium implant              |
| 2    | A     | Male   | 21            | Ameloblastoma                     | RB             | 1                                   | Customized titanium implant              |
| 3    | A     | Female | 26            | Ameloblastoma                     | BS             | 1                                   | Customized titanium implant              |
| 4    | A     | Female | 50            | Squamous cell carcinoma           | BSS            | 1                                   | Customized titanium implant              |
| 5    | B     | Female | 24            | Ameloblastoma                     | RBS            | 0                                   | Reconstruction plate                     |
| 6    | B     | Female | 43            | Osteofibroma                      | RBSS           | 2                                   | Reconstruction plate                     |
| 7    | B     | Male   | 32            | Keratocystic odontogenic<br>tumor | BR             | 3                                   | Reconstruction plate                     |
| 8    | B     | Male   | 55            | Mandibular cyst                   | BR             | 0                                   | Reconstruction plate                     |
| 9    | B     | Male   | 18            | Ameloblastoma                     | B              | 0                                   | Reconstruction plate                     |
| 10   | B     | Female | 77            | Ameloblastoma                     | BR             | 0                                   | Reconstruction plate                     |
| 11   | C     | Male   | 50            | Keratocystic odontogenic<br>tumor | CRBSS          | 3                                   | Vascularized fibular osteocutaneous flap |
| 12   | C     | Male   | 27            | Ameloblastoma                     | BR             | 0                                   | Vascularized fibular osteocutaneous flap |
| 13   | C     | Male   | 51            | Ameloblastoma                     | BS             | 0                                   | Vascularized fibular osteocutaneous flap |
| 14   | C     | Male   | 30            | Ameloblastoma                     | SBR            | 1                                   | Vascularized fibular osteocutaneous flap |
| 15   | C     | Male   | 29            | Ameloblastoma                     | RB             | 0                                   | Vascularized fibular osteocutaneous flap |
| 16   | C     | Female | 29            | Ameloblastoma                     | RB             | 0                                   | Vascularized fibular osteocutaneous flap |
| 17   | C     | Male   | 39            | Ameloblastoma                     | SBR            | 0                                   | Vascularized fibular osteocutaneous flap |
| 18   | C     | Male   | 65            | Ameloblastoma                     | BS             | 1                                   | Vascularized fibular osteocutaneous flap |
| 19   | C     | Female | 19            | Ameloblastoma                     | RB             | 0                                   | Vascularized fibular osteocutaneous flap |
| 20   | C     | Male   | 29            | Osteofibroma                      | SSBR           | 1                                   | Vascularized fibular osteocutaneous flap |

C, condyle; mandibular ascending branch; B, mandible body; S, mandibular mental region.

Table SII. Post-operative evaluation of facial and mandibular functions.

| Items                       | Score                                                                                   |                                                                                   |                                                          |                                                                    |
|-----------------------------|-----------------------------------------------------------------------------------------|-----------------------------------------------------------------------------------|----------------------------------------------------------|--------------------------------------------------------------------|
|                             | I                                                                                       | II                                                                                | III                                                      | IV                                                                 |
| Facial appearance           | Balanced mandibular contour symmetry                                                    | The affected side is slightly sunken or swollen when viewed from a close distance | The ipsilateral side shows obvious depression or bulging | Extremely asymmetrical with significant depression or bulging      |
| Occulusal force and chewing | Normal occulusal force, no temporomandibular joint symptoms, chewing efficiency is >80% | Restored occulusal force, chewing efficiency is 60-80%                            | Restored occulusal force, chewing efficiency is 40-60%   | Significantly restored occulusal force, chewing efficiency is <40% |
| Pain                        | Level 1 (None)                                                                          | Level 2 (Mild)                                                                    | Level 3 (Moderate)                                       | Level 4 (Severe)                                                   |
| Opening mouth               | Normal maximum mouth opening ( $\geq 3$ fingers)                                        | Mild mouth opening (2-3 fingers)                                                  | Limited mouth opening (1-2 fingers)                      | Severely limited mouth opening (<1 finger)                         |
| Speech                      | Not affected at all                                                                     | Slightly difficult to talk                                                        | Difficult to talk                                        | Very difficult to talk                                             |
| Swallowing/eating           | Swallow and eat normally                                                                | Can eat soft food (somewhat difficult to eat)                                     | Semi-liquid diet (difficult)                             | Only liquid diet (very difficult)                                  |
| Mentality                   | Able to socialize normally                                                              | A little difficult to socialize                                                   | Moderately difficult to socialize                        | Very difficult to socialize                                        |

Table SIII. Post-operative evaluation of mandibular reconstruction.

| Case | Group | Operation time, min | Follow-up, months | Evaluation grade | Satisfactory feedback | Material rejection reaction | Postoperative complications                         |
|------|-------|---------------------|-------------------|------------------|-----------------------|-----------------------------|-----------------------------------------------------|
| 1    | A     | 150                 | 19                | I                | Satisfactory          | No                          | No                                                  |
| 2    | A     | 120                 | 14                | I                | Satisfactory          | No                          | No                                                  |
| 3    | A     | 90                  | 12                | I                | Satisfactory          | No                          | No                                                  |
| 4    | A     | 160                 | 3                 | II               | Satisfactory          | No                          | Mild limited mouth opening                          |
| 5    | B     | 180                 | 15                | II               | Satisfactory          | No                          | Impaired chewing function                           |
| 6    | B     | 240                 | 21                | III              | Fair                  | No                          | Postoperative infection                             |
| 7    | B     | 210                 | 18                | II               | Satisfactory          | No                          | No                                                  |
| 8    | B     | 200                 | 29                | IV               | Dissatisfactory       | Yes                         | Titanium plate loosening and exposure               |
| 9    | B     | 220                 | 36                | II               | Satisfactory          |                             | No                                                  |
| 10   | B     | 150                 | 48                | III              | Fair                  | No                          | Tumor recurrence or reoperation                     |
| 11   | C     | 480                 | 21                | II               | Fair                  | No                          | Limited mouth opening and impaired chewing function |
| 12   | C     | 360                 | 19                | III              | Dissatisfactory       | No                          | Facial asymmetry                                    |
| 13   | C     | 330                 | 18                | II               | Satisfactory          | No                          | Shin pain                                           |
| 14   | C     | 450                 | 18                | II               | Satisfactory          | No                          | Mild limited mouth opening                          |
| 15   | C     | 375                 | 32                | IV               | Satisfactory          | Yes                         | Rejection reaction                                  |
| 16   | C     | 300                 | 41                | I                | Satisfactory          | No                          | No                                                  |
| 17   | C     | 360                 | 46                | III              | Dissatisfactory       | Yes                         | Postoperative infection and facial asymmetry        |
| 18   | C     | 600                 | 35                | III              | Fair                  | No                          | Impaired chewing function                           |
| 19   | C     | 530                 | 42                | II               | Satisfactory          | No                          | Impaired chewing function                           |
| 20   | C     | 580                 | 42                | II               | Satisfactory          | No                          | No                                                  |
